# Supplementary material for: Cluster Analysis of Physical Activity Patterns, and Relationship with Sedentary Behavior and Healthy Lifestyles in Prepubertal Children: Genobox Cohort
Source: PubMed Central journal article supplement (PMC7282254; doi:10.3390/nu12051288), 2020-05-01
Supplement: nutrients-12-01288-s001.pdf [file nutrients-12-01288-s001.pdf]

**Supplementary Table S1.** Statistical transformed data of variables showed in table S1, that not presented a normal distribution.

| Variables                                                                    | Cluster 1<br>(n=100)       | Cluster 2<br>(n=294)        | Cluster 3<br>(n=73)         | P(ANCOVA)        |
|------------------------------------------------------------------------------|----------------------------|-----------------------------|-----------------------------|------------------|
| <i>Characteristics of sample and anthropometric measurements</i>             |                            |                             |                             |                  |
| Age (years)                                                                  | 3.37± 0.34 <sup>(a)</sup>  | 3.13 ± 0.19 <sup>(b)</sup>  | 3.31 ± 0.39 <sup>(a)</sup>  | <b>0.027</b>     |
| Height (cm)                                                                  | 0.41± 0.08                 | 0.34 ± 0.1                  | 0.39 ± 0.1                  | 0.355            |
| Weight (kg)                                                                  | 7.70± 1.22 <sup>(a)</sup>  | 6.74 ± 1.28 <sup>(b)</sup>  | 7.25 ± 1.34 <sup>(ab)</sup> | 0.074            |
| DBP (mmHg)                                                                   | 4.19 ± 0.15 <sup>(a)</sup> | 4.17 ± 0.13 <sup>(ab)</sup> | 4.15 ± 0.15 <sup>(b)</sup>  | 0.113            |
| WC (cm)                                                                      | 4.43 ± 0.19 <sup>(a)</sup> | 4.32 ± 0.21 <sup>(b)</sup>  | 4.37± 0.21 <sup>(ab)</sup>  | 0.393            |
| <i>Time physical activity intensity and sedentary behavior (minutes/day)</i> |                            |                             |                             |                  |
| Moderate PA                                                                  | 3.34 ± 0.37 <sup>(a)</sup> | 3.53 ± 0.38 <sup>(b)</sup>  | 3.90 ± 0.34 <sup>(c)</sup>  | <b>&lt;0.001</b> |
| Vigorous PA                                                                  | 2.06 ± 0.75 <sup>(a)</sup> | 2.34 ± 0.65 <sup>(b)</sup>  | 3.37 ± 0.54 <sup>(c)</sup>  | <b>&lt;0.001</b> |
| MVPA                                                                         | 3.61 ± 0.42 <sup>(a)</sup> | 3.82 ± 0.40 <sup>(b)</sup>  | 4.41 ± 0.29 <sup>(c)</sup>  | <b>&lt;0.001</b> |
| <i>Metabolic markers</i>                                                     |                            |                             |                             |                  |
| Glucose (mg/dL)                                                              | 4.45 ± 0.09                | 4.45 ± 0.09                 | 4.45 ± 0.09                 | 0.983            |
| Insulin (mU/L)                                                               | 3.73 ± 1.12 <sup>(a)</sup> | 3.02 ± 1.06 <sup>(b)</sup>  | 3.14 ± 1.19 <sup>(b)</sup>  | <b>0.016</b>     |
| HOMA-IR                                                                      | 1.73 ± 0.53 <sup>(a)</sup> | 1.40 ± 0.51 <sup>(b)</sup>  | 1.45 ± 0.52 <sup>(b)</sup>  | <b>0.020</b>     |
| TAG (mg/dL)                                                                  | 4.28 ± 0.42 <sup>(a)</sup> | 4.12 ± 0.45 <sup>(b)</sup>  | 4.06 ± 0.48 <sup>(b)</sup>  | <b>0.001</b>     |
| HDL-c (mg/dL)                                                                | 3.87 ± 0.26                | 3.93 ± 0.30                 | 3.94 ± 0.26                 | 0.103            |
| LDL-c (mg/dL)                                                                | 9.75 ± 1.50                | 9.64 ± 1.34                 | 9.46 ± 1.12                 | 0.263            |
| Urea (mg/dL)                                                                 | 3.32 ± 0.28                | 3.38 ± 0.25                 | 3.39 ± 0.24                 | 0.313            |
| Ferritin (ng)                                                                | 7.02 ± 1.72                | 7.12 ± 2.29                 | 6.63 ± 1.72                 | 0.171            |

Variables transformed by means of natural log: Height; Glucose; Urea; DBP: diastolic blood pressure; HDL: high-density lipoprotein; TAG: triacylglycerides; WC: waist circumference; MVPA: moderate and vigorous physical activity; PA: physical activity (moderate, vigorous, and moderate-vigorous). Variables transformed by means of square root: Age; weight; Insulin; HOMA-IR; Ferritin; LDL: low-density lipoprotein. Mean ± standard deviation. ANCOVA adjusted by age or, age and BMI as indicated. No matching superscript letters (a, b, c) indicate significant differences by Dunn post-hoc test ( $P < 0.05$ ).
